1 RESEARCH PAPER

2

3 **Comparative hormonal regulatory pathway of the drought responses in relation to glutamate-**  
4 **mediated proline metabolism in *Brassica napus***

5

6 Van Hien La<sup>1,†</sup>, Bok-Rye Lee<sup>1,†</sup>, Md. Tabibul Islam<sup>1</sup>, Sang-Hyun Park<sup>1</sup>, Dong-Won Bae<sup>2</sup>,  
7 Tae-Hwan Kim<sup>1,\*</sup>

8

9 <sup>1</sup>Department of Animal Science, Institute of Agricultural Science and Technology, College of Agriculture  
10 & Life Science, Chonnam National University, Buk-Gwangju P.O. Box 205, Gwangju, 61186, Korea

11 <sup>2</sup>Central Instruments Facility, Gyeongsang National University, Jinju, 52828, Korea

12

13 <sup>†</sup> These authors have contributed equally to this work

14

15 \*Correspondence: Tae-Hwan Kim; Tel: +82-62-530-2126; E-mail: grassl@chonnam.ac.kr

16

17 **Contact of other authors:**

18 Van Hien La: hiencnsh87@gmail.com

19 Bok-Rye Lee: turfphy@hotmail.com

20 Md. Tabibul Islam: tabib\_pha@hotmail.com

21 Sang-Hyun Park: ghost1284@nave.com

22 Dong-Won Bae: bdwon@gnu.ac.kr

23

24 **Running title:** Glutamate modulated drought responses

25

26 Date of submission: July 16, 2019

27 Number of tables: 1

28 Number of figures: 8

29 Supporting table: 1

30 Supporting figures: 2

31 Word count: 4947

32 **Highlight**

- 33 • Drought-induced oxidative stress and symptom are developed by ABA-dependent manner
- 34 • Glu-application increases endogenous SA level with an antagonistic decrease of ABA
- 35 • Drought-induced proline accumulation was further enhanced by exogenous Glu-application
- 36 • Glu-enhanced proline synthesis accompanied with SA-mediated regulatory pathway
- 37 • Glu-enhanced SA-modulated proline metabolism is an integrated process of redox control

38

39 **Abstract**

40 Proline metabolism influences metabolic and signaling pathway in regulating plant stress responses.  
41 This study aimed to characterize the physiological significance of glutamate (Glu)-mediated proline  
42 metabolism in the drought stress responses, focusing on the hormonal regulatory pathway. The  
43 responses of cytosolic  $\text{Ca}^{2+}$  signaling, proline metabolism and redox components to the exogenous  
44 application of Glu in well-watered or drought-stressed plants were interpreted in relation to endogenous  
45 hormone status and their signaling genes. Drought-enhanced abscisic acid (ABA) were concomitant  
46 with ROS and proline accumulation, accompanied by decreased  $\text{NAD(P)H/NAD(P)}^+$  and  $\text{GSH/GSSG}$   
47 ratios. Exogenous Glu-feeding under drought resulted in an increase of salicylic acid (SA) with an  
48 antagonistic decrease of ABA. Glu-enhanced SA coincided with the highest expression of SA synthesis  
49 related gene *ICS1* and  $\text{Ca}^{2+}$ -dependent protein kinase *CPK5*. SA-enhanced *CPK5* expression was  
50 closely associated with further enhancement of proline synthesis-related genes (*P5CS1*, *P5CS2*, and  
51 *P5CR*) expression. The Glu-activated proline synthesis was responsible for the reset of reducing  
52 potential with enhanced expression of redox regulating genes *TRXh5* and *GRXC9* in a SA-mediated  
53 *NPR1*- and/or *PRI*-dependent manner. These results clearly indicate that Glu-activated interplay  
54 between SA- and *CPK5*-signaling and Glu-enhanced proline synthesis are crucial in the amelioration of  
55 drought stress in *B. napus*.

56

57 **Keywords:** *Brassica napus*, calcium signaling, glutamate, proline synthesis, redox, salicylic acid

## 58 **Introduction**

59 Prolonged water-deficit (e.g., drought) is considered a major climatic factor limiting plant growth and  
60 development. The decrease in water availability for transport-associated processes modifies  
61 intercellular metabolites concentration, followed by the disturbance of amino acid and carbohydrate  
62 metabolism (Kim *et al.*, 2004; Lee *et al.*, 2016). An accumulation of reactive oxygen species (ROS)  
63 and/or proline is observed as a common stress response (Lee *et al.*, 2013; Rejeb *et al.*, 2014). Indeed,  
64 rapid production of ROS (i.e., oxidative burst) is one of the earliest plant responses to stresses caused  
65 by a wide range of environmental stresses (Lee *et al.*, 2009a) and pathogen infections (Finiti *et al.*,  
66 2014; Islam *et al.*, 2017). Proline accumulation has been found to be also a primary stress responsive  
67 symptom resulting from dehydration in plant tissues such as drought conditions (Kim *et al.*, 2004; Lee  
68 *et al.*, 2009b), high salinity (Hong *et al.*, 2000), or freezing temperature (Kaplan *et al.*, 2007). The  
69 proline pool of plant cells depends on the rate-limiting steps in proline synthesis and degradation,  
70 which are catalyzed by  $\Delta^1$ -pyrroline-5-carboxylate synthase (P5CS) and proline dehydrogenase  
71 (ProDH) (Rejeb *et al.*, 2014; 2015; La *et al.*, 2019). Multifunctional roles of proline including in  
72 preventing oxidative damage, in stabilizing DNA, membranes and protein complex as well as in  
73 providing carbon and nitrogen source during stress have been well documented (Szabados and Savaouré,  
74 2010). Interestingly, proline metabolism has been reported to promote mitochondrial ROS production  
75 and enhance ROS in hypersensitive plants (Liang *et al.*, 2013). Therefore, the modified proline  
76 metabolism by drought stress may further involves in drought stress tolerance by regulating  
77 intracellular redox potential (La *et al.*, 2019), as well as energy transfer and reducing power (Szabados  
78 and Savaouré, 2010; Rejeb *et al.*, 2014), which are not yet fully understood.

79 Increasing evidences have shown that stress responsive ROS and/or proline metabolism are  
80 regulated by hormonal signaling pathways (Miura and Tada, 2014; Herrera-Vásquez *et al.*, 2015; La *et al.*,  
81 2019). Among these, ABA-dependent signaling pathway has been more emphasized (Boudsocq and  
82 Sheen, 2013; Osakabe *et al.*, 2014). Indeed, proline accumulation is partially regulated by an ABA-  
83 dependent signaling pathway in osmotic (Chung *et al.*, 2008) and drought stress (La *et al.*, 2019).  
84 Similarly, enhanced H<sub>2</sub>O<sub>2</sub>, as a ROS signaling from NADPH oxidase, stimulate ABA-induced proline  
85 accumulation (Verslues *et al.*, 2007; La *et al.*, 2019). Several studies have provided evidence for the  
86 ROS-mediated SA biosynthesis *via* Ca<sup>2+</sup> signaling (Seyfferth and Tsuda, 2014; Herrera-Vásquez *et al.*,  
87 2015), as well as the proline-mediated biosynthesis of SA *via* NDR1-dependent signaling (Chen *et al.*,

88 2011). Recently, SA-mediated proline synthesis has been elucidated in relation to SA-dependent  
89 NPR1-mediated redox control with an antagonistic depression of ABA-signaling (La *et al.*, 2019).  
90 Furthermore, Ca<sup>2+</sup>-dependent protein kinases (CPKs) are now known to play a central role in innate  
91 immune as a stress signaling by collaborating with hormonal signaling (Boudsocq and Sheen, 2013;  
92 Seyfferth and Tsuda, 2014). However, the ambivalent roles of ROS and proline in promoting stress  
93 tolerance and developing hypersensitive toxicity in connection with hormonal signaling pathway  
94 remain poorly understood.

95 Accordingly, the aims of the present study were to investigate the following hypotheses: 1) that  
96 exogenous Glu-application would enhance proline synthesis and subsequently modify the interplay  
97 between ROS and proline metabolism in association with hormonal regulation under drought stress,  
98 and 2) that stress response and tolerance mechanisms are differently regulated by the modified  
99 hormonal state and their signaling. To test these hypotheses, the drought-responsive hormonal status,  
100 ROS production, proline metabolism, and redox state were compared to the exogenous Glu-mediated  
101 changes with intention of characterizing hormonal regulation.

102

## 103 **Materials and Methods**

### 104 *Plant growth and treatment*

105 *Brassica napus* (cv.Pollen) seeds were germinated in the bed soil in a tray. Upon reaching the four-leaf  
106 stage, seedlings were transplanted in 2 litter pots that contained a 70:30 (w:w) mixture of soil and  
107 perlite, and grown with 100 ml nutrients solution (Lee *et al.*, 2015). At the 6-7 leaves stage, plants were  
108 selected by morphological similarity and divided into two groups for the drought treatment. One group  
109 was normally irrigated with 200 ml for well-watered plants or with 20 ml for drought-stressed plants.  
110 After 5 days of drought treatment, both the well-watered and drought-treated group were divided into  
111 two sub-groups that were applied without or with 20 mM glutamate for 10 days. Glutamate application  
112 was done on the basis of preliminary test referring to the previous study (Kan *et al.*, 2017). Thus, the  
113 experiment consisted of 4 treatments: well-watered (Control), Glu-application under well-watered  
114 (Glu), drought alone (Drought), and Glu-application under drought condition (Drought + Glu). The  
115 plants were grown in a greenhouse with day/night mean temperature of 27/20 °C and relative humidity  
116 of 65/85%. Natural light was supplemented by metal halide lamps that generated 200 μmol photons m<sup>-2</sup>

117  $s^{-1}$  at the canopy height for 16 h per day. The sampling was conducted at 5 days of drought (d 5) and at  
118 10 days after glutamate application (d 15), respectively.

119

#### 120 *Osmotic potential and measurement of photosynthetic pigment content*

121 For the measurement of osmotic potential, fresh leaves were frozen in liquid nitrogen and then allowed  
122 them to thaw, followed by centrifugation at  $13,000 \times g$  for 15 min. The collected sap was used for  
123 measuring osmolality by using a vapor pressure osmometer (Wescor 5100; Wescor Inc., Logan, UT).  
124 For total chlorophyll and carotenoid content, fresh leaves (100 mg) were immersed in 10 ml of 99%  
125 dimethyl sulfoxide. After 48 h, the absorbance of the supernatants was read at 480 nm and 510 nm for  
126 carotenoid, and 645 nm and 663 nm for total chlorophyll by using a microplate reader (Synergy H1  
127 Hybrid Reader; Biotek, Korea).

128

#### 129 *Determination of ROS production and antioxidative enzymes activity*

130 For the visualization of  $H_2O_2$  and  $O_2^{\bullet -}$ , leaf discs were stained with 3,3'-diaminobenzidine (DAB) and  
131 nitroblue tetrazolium (NBT), respectively, as described previously (Lee *et al.*, 2009a; Islam *et al.*,  
132 2017). The activity of superoxide dismutase (SOD) and catalase (CAT) were determined using the  
133 method of Lee *et al.* (2013). One unit of SOD enzyme activity was defined as the amount of enzyme  
134 required to inhibit 50% of the NBT photoreduction observed in negative control reactions. One unit of  
135 CAT enzyme activity was defined as the amount of enzyme required to degrade  $1 \text{ mM } H_2O_2 \text{ min}^{-1}$ .

136

#### 137 *Measurement of cytosolic $Ca^{2+}$ concentration*

138 Cytosolic  $Ca^{2+}$  levels were estimated using aequorin luminometry detection (Tanaka *et al.*, 2010) with  
139 some modifications. Briefly, 200 mg fresh leaves were extracted in a buffer solution containing 1 mM  
140 KCl, 1 mM  $CaCl_2$ , and 10 mM  $MgCl_2$ , adjusted pH to 5.7 using Tris-base, and centrifuged at  $12,000 \times g$   
141 for 10 min. One hundred micro liter of supernatant was incubated with 1  $\mu l$  of 0.1 mM coelenterazine-  
142 h in a 96-well plate for 30 min to facilitate binding between coelenterazine-h (Sigma) and aequorin.  
143 After incubation, an equal volume of 2 M  $CaCl_2$ , which was dissolved in 30% ethanol (v/v), was added  
144 to discharge the remaining aequorin. Calcium concentration was determined by luminescence,  
145 according to Knight *et al.* (1996).

146

147 *Determination of proline and  $\Delta^1$ -pyrroline-5-carboxylate content*

148 For the determination of proline and pyrroline-5-carboxylate (P5C) content, fresh leaf (200 mg) was  
149 homogenized in 3% sulfosalicylic acid and centrifuged at 13,000  $\times g$  for 10 min. The resulting  
150 supernatants were mixed with ninhydrin solution containing acetic acid and 6 M H<sub>3</sub>PO<sub>4</sub> (v/v, 3:2) and  
151 boiled at 100 °C for 1 h. Then, toluene was added to the mixture, which was incubated for 30 min. The  
152 absorbance was determined at 520 nm and quantified as described previously (Lee *et al.*, 2009b). P5C  
153 content was determined according to method described by Mezl and Knox (1976). The supernatants were  
154 mixed with 10 mM of 2-aminobenzaldehyde dissolved in 40% ethanol. Then, the mixture was  
155 incubated at 37 °C for 2 h to develop the yellow color. The absorbance was measured at 440 nm and  
156 calculated by using an extinction coefficient 2.58 mM<sup>-1</sup> cm<sup>-1</sup>.

157

158 *Collection of phloem exudate and xylem sap*

159 Phloem exudates were collected in ethylenediaminetetraacetic acid (EDTA) using the facilitated  
160 diffusion method, as described previously (Lee *et al.*, 2009b). The fourth fully extended leaf was cut  
161 and immediately rinsed in 20 mM EDTA solution (pH 7.0) for 5 min. The leaf was then transferred to a  
162 new tube containing 5 mM EDTA solution and kept for 6 h in a growth chamber with 95% relative  
163 humidity under dark conditions. Xylem sap was collected by a vacuum-suction technique (Kotov and  
164 Kotova, 2015). Both the phloem exudates and xylem sap were stored at -20°C for further analysis.

165

166 *Measurement of glutathione and pyridine nucleotides*

167 For the extraction of glutathione, 200 mg fresh leaves were homogenized in 5% 5-sulfosalicylic acid  
168 and centrifuged at 12,000  $\times g$  for 10 min. The glutathione content of the resulting supernatants was then  
169 determined by microplate assay using the GSH/GSSG Kit GT40 (Oxford Biomedical Research, Inc.).  
170 The contents of oxidized and reduced pyridine nucleotides were measured as described previously (La  
171 *et al.*, 2019).

172

173 *Phytohormone analysis*

174 Quantitative analysis of phytohormones in leaf tissue was performed by a high-performance liquid  
175 chromatography-electrospray ionization tandem mass spectrometry (HPLC–ESI–MS/MS) (La *et al.*,  
176 2019). Brief, fifty milligrams of fresh leaves in a 2-ml tube was frozen in liquid nitrogen and ground  
177 using a TissueLyser II (Qiagen). The ground sample was extracted with 500  $\mu$ l of extraction solvent, 2-  
178 propanol/H<sub>2</sub>O/concentrated HCl (2:1:0.002, v/v/v). Dichloromethane (1 ml) was added to the  
179 supernatant, and this was then centrifuged at 13,000  $\times g$  for 5 min at 4 °C. The lower phase, which was  
180 poured into a clean screw-cap glass vial, was dried under nitrogen and dissolved in pure methanol. The  
181 completely dissolved extract, ensured by vortexing and sonicating, was transferred to a reduced volume  
182 liquid chromatography vial. Hormones were analyzed by a reverse phase C18 Gemini high-  
183 performance liquid chromatography (HPLC) column for HPLC–ESI–MS/MS analysis. The  
184 chromatographic separation of hormones and its internal standard from the plant extracts was  
185 performed on an Agilent 1100 HPLC (Agilent Technologies), Waters C18 column (15,092.1 mm, 5.1  
186 m), and API3000 MS/MS (Applied Biosystems), using a binary solvent system comprising 0.1%  
187 formic acid in water (Solvent A) and 0.1% formic acid in methanol (Solvent B) at a flow rate of 0.5  
188 ml/min.

189

#### 190 *RNA extraction and quantitative real-time PCR analysis*

191 Total RNA was isolated from 200 mg fresh leaf using an RNAiso Plus (Takara, DALIAN), and cDNA  
192 was synthesized using the GoScript Reverse Transcription System (Promega). Gene expression was  
193 quantified using a light cycle real-time PCR detection system (Bio-Rad, Hercules, CA, USA) with  
194 SYBR Premix Ex Taq (Takara, DALIAN). The PCR reactions were performed using the following  
195 conditions: 95 °C for 5 min; and then followed by 45 cycles of 95 °C for 30 s, 55–60 °C for 30 s, and  
196 72 °C for 30 s; and a final extension of 72 °C for 5 min. The qRT-PCR was performed using gene-  
197 specific primers (Supplementary Table S1). The qPCR reactions were performed in triplicate for each  
198 of three independent samples, and the relative expression levels of the target genes were calculated  
199 from threshold values (Ct), using the  $2^{-\Delta\Delta CT}$  method (Livak and Schmittgen, 2001) and the actin gene as  
200 an internal control.

201

#### 202 *Statistical analysis*



203 The present study used a completely randomized design with three replicates for each treatment and  
204 sampling date. Analysis of variance (ANOVA) was applied to all data, and Duncan's multiple range  
205 test was used to compare the means of separate replicates. All statistical tests were performed using  
206 SAS 9.1 (SAS Institute, Inc., 2002-2003), and differences at  $P < 0.05$  were considered significant. The  
207 heatmap, correlation coefficient, and pathway impact analyses were performed using MetaboAnalyst  
208 3.0 (<http://www.metaboanalyst.ca>).

209

## 210 **Results**

### 211 *Physiological symptoms, osmotic potential, and pigments*

212 Drought stress induced severe leaf wilting and reduction in leaf osmotic potential. However, drought-  
213 induced negative effects were diminished in the glutamate (Glu)-treated plants (Fig. 1A, B).  
214 Chlorophyll and carotenoid contents were less or significantly reduced, respectively, by drought stress;  
215 however, both were greatly enhanced by Glu treatment. Under the well-watered conditions, exogenous  
216 Glu treatment significantly enhanced the content of these two pigments (Fig. 1C, D).

217

### 218 *Phytohormone content and related gene expression*

219 Endogenous level of abscisic acid (ABA) was remarkably increased in the treatment of drought alone  
220 (6.4-fold higher than that in the control), whereas it was significantly alleviated in the Drought + Glu  
221 treatment (3.6-fold higher than that in the control) at day 15. In contrast, drought-induced salicylic acid  
222 (SA) accumulation was further elevated in the Drought + Glu treatment (20% higher than that in  
223 drought alone). No significant difference was observed in the Glu treatment under well-watered  
224 conditions (Fig. 2A, B). In drought-stressed plants at day 15, compared to the control, content of IAA  
225 (indole-3-acetic acid) and CK (cytokinin) were largely increased by 2.1- and 1.3-fold, respectively,  
226 regardless of Glu treatment. IAA content was significantly increased in Glu-treated plants under the  
227 well-watered condition, whereas CK content was largely reduced (Fig. 2C, D). These results coincided  
228 with the expression pattern of hormone synthesis or signaling regulatory genes (Fig. 3).

229 Drought stress remarkably upregulated the expression of the ABA signaling-related genes, myb-  
230 like transcription factor (*MYB2.1*) and NAC domain-containing protein 55 (*NAC55*). However,  
231 enhanced expression of these two genes was largely depressed by the Drought + Glu treatment (Fig. 3A,



232 B). In addition, expression of the SA synthesis-related genes, WRKY transcription factor 28 (*WRKY28*)  
233 and isochorismate synthase 1 (*ICSI*), were significantly upregulated by drought. A much higher  
234 expression of these genes was observed in the Drought + Glu treatment (Fig. 3C, D). Expression of the  
235 SA signaling related genes, nonexpressor of pathogenesis-related (PR) gene (*NPR1*) and *PR-I*, were  
236 significantly depressed upon drought stress at day 5 and, then, significantly upregulated at day 15. The  
237 Drought + Glu treatment further upregulated the expression of *NPR1* and *PR1* (Fig. 3E, F). No  
238 significant difference in these genes was observed in the Glu treatment under the well-watered  
239 conditions, expect for *NPR1* and *PR1* (Fig. 3A-F).

240

#### 241 *Glutamate receptor, ROS, Ca<sup>2+</sup> signaling, and antioxidant activity*

242 The expression of glutamate receptor, GLR1.3, was remarkably upregulated by drought stress. It was  
243 enhanced considerably by Glu treatment (Fig. 4A). A significant accumulation of ROS (O<sub>2</sub> and H<sub>2</sub>O<sub>2</sub>)  
244 production was observed with *in situ* localization of O<sub>2</sub> and H<sub>2</sub>O<sub>2</sub> under drought treatment, indicated by  
245 dark spots (Fig. 4B, C). Cytosolic Ca<sup>2+</sup> content significantly increased with drought treatment, with 56%  
246 in the drought alone treatment and 85% in the Drought + Glu treatment compared to that in the control  
247 (Fig. 4D). Expression of calcium signaling-related gene, calcium-dependent protein kinase 5 (*CPK5*)  
248 was significantly induced by drought and/or Glu treatments throughout the experimental period. The  
249 greatest level was observed in the Drought + Glu treatment (Fig. 4E). The expression of *NADPH*  
250 *oxidase* was only enhanced significantly with drought alone treatment (Fig. 4F). Superoxide dismutase  
251 (SOD) activity was largely increased under drought conditions, regardless of Glu treatment  
252 (Supplementary Fig. S1A). The drought-induced increase in catalase (CAT) activity and its gene  
253 expression was further activated by Glu treatment (Supplementary Fig. S1B, C).

254

#### 255 *Proline metabolism and transport*

256 Pyrroline-5-carboxylate (P5C) content was significantly increased by 2.4-fold under drought with or  
257 without Glu treatment at day 15, compared with that in the control (Fig. 5C). Drought stress  
258 significantly induced proline accumulation throughout the experimental period, with a much greater  
259 increase in the Drought + Glu treatment (2.7 fold-higher than that in the drought alone treatment; Fig.  
260 5E). Expression of proline synthesis-related genes, P5C synthase 1 (*P5CS1*), *P5CS2*, and P5C  
261 reductase (*P5CR*), were remarkably upregulated by drought and/or Glu treatment. Expression of these

262 genes was much higher in the Drought + Glu treatment (Fig. 5A, B, D). The proline degradation-  
263 related genes, proline dehydrogenase (*PDH*) and pyrroline-5-carboxylate dehydrogenase (*P5CDH*),  
264 were differently expressed during the experimental period. The expression of *PDH* was largely  
265 depressed by drought and/or Glu treatments, whereas expression of *P5CDH* was significantly enhanced  
266 by the drought treatment (Fig. 5F, G). Proline content in the phloem and xylem was greatly increased  
267 by drought and/or Glu treatments. The highest proline content was observed in the Drought + Glu  
268 treatment (Supplementary Fig. S2A, B).

269

#### 270 *Redox status and redox signaling component*

271 NAD(P)H content was significantly increased by drought stress compared with that of the control,  
272 whereas it was much more enhanced by Glu treatment. Drought-induced NAD(P)<sup>+</sup> accumulation was  
273 significantly alleviated by Glu treatment. The ratio of NAD(P)H to NAD(P)<sup>+</sup> was largely decreased by  
274 the drought treatment. However, its reduction was largely mitigated in the Drought + Glu treatment.  
275 Reduced glutathione (GSH) content was greatly decreased by 86.3% under the drought alone treatment  
276 compared with that under the control, whereas it recovered to 72.7% of that in the control in the  
277 Drought + Glu treatment. Oxidized glutathione (GSSG) content was similar between treatments.  
278 Drought-induced reduction of the ratio of GSH to GSSG was largely recovered with Glu treatment  
279 (Table 1). Drought and/or Glu treatments significantly enhanced the expression of the oxidoreductase-  
280 encoding genes, CC-type glutaredoxin 9 (*GRXC9*) and thioredoxin-h5 (*TRXh5*), and this increase was  
281 much higher in the Drought + Glu treatment (Fig. 6A, B). The expression of TGA-box transcription  
282 factor (*TGA2*) was upregulated only in the Drought + Glu treatment (Fig. 6C).

283

#### 284 *Heatmap visualization and Pearson correlation analysis for the metabolites or gene expression*

285 To further clarify the metabolites or gene expression levels affected by the drought-stress and/or Glu  
286 treatments, the results of hormones, ROS, upstream ROS signal, glutamate receptor, proline  
287 metabolism, redox status, and their signaling were visualized by heatmap and Pearson correlation  
288 coefficients (Fig. 7). The drought effect was notably higher on the increase of ABA and its signaling  
289 gene *MYB2.1*, H<sub>2</sub>O<sub>2</sub>, NADPH oxidase as well as on the reduction of reducing potential  
290 [NAD(P)H/NAD(P)<sup>+</sup> and GSH/GSSG]. These drought effects were alleviated with the Drought + Glu  
291 treatment, resulting in an increase in SA and its synthesis or signaling gene (*NPR1* or *WRKY28*,

292 respectively), CPK5, reducing potential, and proline synthesis (Fig. 7A). The correlations of proline  
293 revealed a positive relation with the expression of the SA-signaling regulatory genes *NPR1* and *CPK5*.  
294 In addition, SA was closely correlated with the reducing power (Fig. 7B).

295

## 296 **Discussion**

297 The accumulation of proline, which is considered as a representative compatible solute, is commonly  
298 observed in a wide range of abiotic and biotic stresses. This stress response is thought to function as a  
299 protective mechanism in stressed plants (Rejeb *et al.*, 2014; Xia *et al.*, 2015). However, proline  
300 metabolism is responsible for stress-induced ROS production and is, subsequently, involved in the  
301 hypersensitive response of plants (Liang *et al.*, 2013). Therefore, determining the thresholds of  
302 regulatory mechanisms at which proline metabolism switches from hypersensitive responses to stress  
303 resistance (or *vice versa*) would provide valuable insight into the underlying mechanisms of plant stress  
304 responses. Accordingly, one of the aims of the present study was to test the hypothesis that exogenous  
305 Glu would accelerate proline synthesis, because proline is mainly synthesized from Glu under drought  
306 conditions (Rejeb *et al.*, 2014) and because the early Glu-responsive genes encode membrane receptors,  
307 protein kinase/phosphatases, Ca<sup>2+</sup> signaling, and transcription factors (Kan *et al.*, 2017). The present  
308 study, thus, assessed preferentially the effect of Glu-responsive proline metabolism on drought  
309 symptom development.

310 In the present study, the 5-d drought treatment induced the accumulation of both ROS and proline,  
311 as is commonly observed in drought-stressed plants (Lee *et al.*, 2009b; Rejeb *et al.*, 2014; La *et al.*,  
312 2019), and another 10 d of drought (15 d in total) provoked severe drought symptoms, such as leaf  
313 wilting and reduced leaf osmotic potential (Fig. 1A, B). These drought-induced hypersensitive  
314 responses were accompanied with enhanced ROS accumulation (Fig. 4B, C) and reduced reducing  
315 potential (Table. 1). Severe drought symptom in drought alone reflected also the highest ABA  
316 accumulation and ABA-related genes expression (Fig. 2A and 3A, B). ABA has been reported to  
317 stimulate a signaling pathway that triggers ROS production, which in turn induces increases in  
318 cytosolic Ca<sup>2+</sup> (Osakabe *et al.*, 2014). Indeed, drought-induced ABA-mediated ROS accumulation was  
319 concomitant with increased levels of NADPH oxidase (Fig. 4F), accompanied by cytosolic Ca<sup>2+</sup> (Fig.  
320 4D) and CPK5 (Fig. 4E), which is consistent with the findings of previous studies (Boudsocq and  
321 Sheen, 2013; Rejeb *et al.*, 2015; Stael *et al.*, 2015). ROS (mainly H<sub>2</sub>O<sub>2</sub>) accumulation that is

322 accompanied by redox changes might directly or indirectly involve in regulating the transcription of  
323 proline biosynthesis (Rejeb *et al.*, 2015; La *et al.*, 2019). In the present study, a significant  
324 accumulation of proline with enhanced expression of proline synthesis-related genes was observed in  
325 drought-stressed plants, regardless of Glu treatment (Fig. 5). Previous studies have also reported ABA-  
326 induced proline accumulation (Verslues *et al.*, 2007). The simultaneous accumulation of ROS and  
327 ABA has been postulated as a key aspect of cross-tolerance (Verslues *et al.*, 2007). Furthermore, the  
328 interplay between ABA, ROS and proline has been suggested to function as an integrative process in  
329 regulating water stress responses and signal transduction pathways (Verslues *et al.*, 2007; Liang *et al.*,  
330 2013; Osakabe *et al.*, 2014). However, in the present study, the drought-induced ABA-responsive  
331 enhancement of ROS and proline was a hypersensitive response that included the expression of severe  
332 symptoms, whereas the negative symptom induced by drought was significantly alleviated in the  
333 Drought + Glu treatment, despite the additional accumulation of ROS and proline (Figs 1, 4, and 5). It  
334 is, therefore, tempting to characterize the plant immune and stress-signaling networks that trigger  
335 appropriate and diverse downstream responses to drought stress. Of the many networks involved in  
336 responses to drought stress, the present study focused on  $\text{Ca}^{2+}$ -dependent protein kinases (CPKs)  
337 because recent studies have highlighted the roles of CPK-signaling pathways in plant immune and  
338 stress responses (Boudsocq and Sheen, 2013; Stael *et al.*, 2015; Prodhan *et al.*, 2018). In the proposed  
339 model for interactions between ROS and  $\text{Ca}^{2+}$  signaling (Boudsocq and Shen, 2013; Stael *et al.*, 2015),  
340 CPKs, upon activation by the  $\text{Ca}^{2+}$  flux, together with a mitogen-activated protein kinase (MAPK),  
341 trigger the expression of immunity-related genes (Stael *et al.*, 2015). Meanwhile, several protein  
342 kinases, including CPKs, enhance the activity of Rbohs (i.e., NADPH oxidase), thereby promoting the  
343 generation of apoplastic ROS (Boudsocq and Shen, 2013; Dubiella *et al.*, 2013). In the present study,  
344 the drought-stress treatment induced increases in glutamate receptor GLR1.3 (Fig. 4A), cytosolic  $\text{Ca}^{2+}$   
345 (Fig. 4D), and *CPK5* expression (Fig. 4E), regardless of Glu treatment. Boudsocq and Sheen (2013)  
346 reported that the signal through ABA synthesis activates CPKs, which regulate ROS and proline  
347 accumulation, water transport (eg., aquaporin) as well as related genes expression. Indeed, in this study,  
348 the enhanced *CPK5* expression in the treatment drought alone was concomitant with an accumulation  
349 of ROS (Fig. 4B, C) and proline (Fig. 5E), accompanied by the highest ABA level and ABA-signaling  
350 genes expression (Figs 2A and 3A, B). In rice, CPKs have been reported to enhance salt-stress  
351 tolerance by regulating ROS homeostasis through the induction of ROS scavenging genes (*APX2/APX3*)  
352 and the suppression of the NADPH oxidase gene, *Rboh1* (Asano *et al.*, 2012). However, in the present

353 study, drought-enhanced ABA-responsive CPK5 was not observed to either suppress NADPH oxidase  
354 or scavenge ROS (Fig. 4). Interestingly, the Drought + Glu treatment further up-regulated *CPK5*  
355 expression, thereby increasing both endogenous SA and the expression of SA synthesis- and signaling-  
356 related genes (*ICS1* and *NPR1*, respectively), with antagonistic depression of ABA level (Fig. 2A) and  
357 the expression of ABA-signaling genes (*MYB2.1* and *NAC55*; Fig. 3A, B). The increased SA and SA-  
358 related gene expression, which coincided with exogenous Glu-enhanced-CPK5, significantly reduced  
359 the accumulation of ROS (Fig. 4B, C) and increased the accumulation of proline (Fig. 5E), thereby  
360 alleviating the negative symptoms of drought stress (Fig. 1). It is worth noting that there was a  
361 remarkable difference in the drought symptoms of the Drought and Drought + Glu plants (Fig. 1A),  
362 even though plants in both treatments exhibited a significant accumulation of ROS and proline, as well  
363 as enhanced cytosolic  $Ca^{2+}$  and *CPK5* expression. These results demand further discussion of the  
364 hormonal regulatory pathways involved in the integrative process of stress tolerance, a discussion  
365 which should emphasize the most distinct differences in the hormonal balance and gene expression of  
366 the two treatment groups (Figs 2 and 3).

367 Several reviews have documented that ROS and proline that is accumulated in response to stress  
368 stimuli function as signaling molecules, with possible interactions with phytohormonal signaling in  
369 metabolic regulatory pathways (Szabados and Savoure', 2010; Liang *et al.*, 2013; Rejeb *et al.*, 2014;  
370 Herrera-Vásquez *et al.*, 2015). In the present study, the simultaneous and significant accumulation of  
371 ROS and proline, accompanied by elevated cytosolic  $Ca^{2+}$  and *CPK5* expression, was observed under  
372 drought stress, regardless of Glu treatment. However, the pattern of ROS and proline, as well as  
373 cytosolic  $Ca^{2+}$  and *CPK5* expression followed by ABA-dependent in the treatment Drought alone,  
374 while SA-dependent manner in the treatment Drought + Glu (Figs 2, 4, and 5A). Furthermore, drought-  
375 induced proline was much more increased in the treatment Drought + Glu, accompanied by further  
376 enhancements of proline synthesis-related genes (*P5CS* and *P5CR*) and depression of proline  
377 degradation-related gene (*PDH*; Fig. 5) expression. The accumulation of proline in response to  
378 exogenous Glu treatment, along with the additional activation of  $Ca^{2+}$  and CPK5, was induced in a SA-  
379 dependent manner (Figs 2B and 4D, E). The  $Ca^{2+}$ -binding transcription factor CBP60g regulates the  
380 transcription of SA biosynthesis genes (e.g., *ICS1/SID2*; Zhang *et al.*, 2010; Wang *et al.*, 2011),  
381 thereby providing a venue for the  $Ca^{2+}$  signal to activate the WRKY28 transcription factor (Fig. 3C) in  
382 SA production. Indeed, the highest expression levels of *ICS1*, *NPR1*, and *PR1* in the Drought + Glu  
383 plants were consistent with the highest proline level and enhanced expression of proline synthesis-

384 related genes (Figs 3D-F and 5), as well as with the downregulation of ABA (Fig. 2A). Similarly, Chen  
385 *et al.* (2011) reported that exogenous proline significantly induced intracellular  $\text{Ca}^{2+}$  accumulation and  
386  $\text{Ca}^{2+}$ -dependent ROS production, thereby enhancing SA synthesis. The results of several other studies  
387 have supported the interplay between SA and proline in regulating stress responses, e.g., proline-  
388 activated SA-induced protein kinase SIPK (Elizabeth and Zhang, 2000), involvement of SA in  
389 exogenous proline-induced salt resistance (Chen *et al.*, 2011), and proline-mediated drought tolerance  
390 (La *et al.*, 2019). Furthermore, elevated SA levels suppressed ROS production in the present study (Fig.  
391 4B, C), potentially through a feedback loop for  $\text{O}_2^{\cdot-}$  (Straus *et al.*, 2010) and the enhanced activation of  
392 CAT for scavenging  $\text{H}_2\text{O}_2$  (Supplementary Fig. S1B). Indeed, SA-activated CAT (Herrera-Vásquez *et al.*  
393 *et al.*, 2015; La *et al.*, 2019) and  $\text{Ca}^{2+}$ -dependent CAT activation (Mou *et al.*, 2003) have been reported  
394 previously. In addition, as far as we know, this study provides the first report of exogenous Glu-  
395 increased proline loading to both the xylem and phloem (Supplementary Fig. S2). Given that glutamate  
396 triggers long-distance,  $\text{Ca}^{2+}$ -based plant defense signaling, it is reasonable to conclude that the Glu-  
397 mediated overproduction of proline could be responsible for SA production and the activation of SA-  
398 signaling and involve also in activation of  $\text{Ca}^{2+}$ -mediated signaling, thereby functioning as a crucial  
399 regulatory pathway of stress tolerance. However, the mechanism by which proline- or SA-elicited ROS  
400 signals activate CPK5 remains unclear and requires further investigation.

401 Calcium-mediated signaling that occurs after the accumulation of SA has been reported to  
402 contribute to the regulation of defense-related gene expression. The interaction of  $\text{Ca}^{2+}$  is enhanced by  
403 the binding of  $\text{Ca}^{2+}$  to leucine zipper transcription factor TGA (Szymanski *et al.*, 1996), which interacts  
404 with NPR1, a critical transcription cofactor in SA perception and the SA-mediated transcriptional  
405 regulation of PR1 through NPR1 (Seyfferth and Tsuda, 2014; Herrera-Vásquez *et al.*, 2015), thereby  
406 providing a possible SA-mediated option to regulate stress tolerance reactions. In the present study,  
407 exogenous Glu-responsive, SA-mediated *NPR1* and *PR1* expression was consistent with the expression  
408 of TGA2 and CPK5, which was greatest in the Drought + Glu plants (Figs 3E-F, 4E, and 6C).  
409 Moreover, a synergistic and significant interaction between proline and SA for SA-transduction  
410 signaling (*NPR1* and *PR1*) was also observed in the Drought + Glu plants (Figs 3E-F and 5E).  
411 Increasing evidence demonstrates that *NPR1* is the first redox sensor to be described for SA-regulated  
412 genes and that *NPR1* is the master co-activator of *PR1* (Mou *et al.*, 2003; Tada *et al.*, 2008; Kneeshaw  
413 *et al.*, 2014; La *et al.*, 2019). Over-produced proline also activated the SA-signaling pathway but not  
414 the JA-signaling pathway (Chen *et al.*, 2011).



415 Given that proline metabolism is directly control NAD(P)<sup>+</sup>/NAD(P)H redox balance (Sharma *et al.*,  
416 2011; Rejeb *et al.*, 2014). These suggest that a significant recovery of reducing potential [GSH/GSSG  
417 and NAD(P)H/NAD(P)<sup>+</sup> ratios] in the treatment Drought + Glu (Table 1) would be closely related with  
418 Glu-enhanced proline synthesis in a SA-mediated redox regulation. Given that proline metabolism is  
419 directly controlled by the NAD(P)<sup>+</sup>/NAD(P)H redox balance (Sharma *et al.*, 2011; Rejeb *et al.*, 2014),  
420 a significant recovery of reducing potential, i.e., GSH/GSSG and NAD(P)H/NAD(P)<sup>+</sup> ratios, in  
421 response to the Drought + Glu treatment (Table 1) would be closely related to Glu-enhanced proline  
422 synthesis, as part of SA-mediated redox regulation. Indeed, in the Drought + Glu treatment, the  
423 oxidoreductase-encoding genes *TRXh5* and *GRXC9* were upregulated in a SA-mediated, NPR1-  
424 dependent manner (Figs 3E and 6). These genes are essential for redox control in SA-mediated  
425 transcriptional responses (Mou *et al.*, 2003; Tada *et al.*, 2008; Herrera-Vásquez *et al.*, 2015). Therefore,  
426 the results of both the present study and previous reports (Mou *et al.*, 2003; Seyfferth and Tsuda, 2014;  
427 La *et al.*, 2019) provide evidence that SA-mediated, NPR1-dependent transcriptional responses, which  
428 may interact with proline metabolism, are integrative cellular redox regulation processes that promote  
429 PR1 induction.

430 The results of the heatmap and Pearson correlation analysis (Fig. 7) provide a basis for a working  
431 model of the signaling pathway that is activated by exogenous Glu (Fig. 8). In summary, the drought-  
432 induced negative stress responses were largely alleviated by exogenous Glu-induced, SA-mediated  
433 modulations that were characterized by 1) antagonistic depression of ABA-dependent metabolic and  
434 signaling pathways, 2) synergetic interaction of CPK5-mediated SA induction and proline synthesis,  
435 and 3) SA-mediated NPR1-dependent redox regulation.

436

### 437 **Supplementary data**

438 **Table S1.** Oligonucleotide primer sequences used for quantitative real-time PCR

439 **Fig S1.** Changes in antioxidative enzymes activity and catalase (*CAT*) gene expression in the leaves of  
440 control or glutamate (Glu)-treated *Brassica napus* under well-watered or drought-stressed conditions.  
441 (A) Superoxide dismutase (SOD) and (B) CAT activity and (C) *CAT* gene expression. qRT-PCR was  
442 performed in duplicate for each of the three independent biological samples. Values are represented as  
443 mean ± SE (n = 3). Different letters on columns indicate significant difference at  $P < 0.05$  according to  
444 the Duncan's multiple range test.



445

446 **Fig S2.** Proline content in phloem and xylem in control or glutamate (Glu)-treated *Brassica napus*  
447 under well-watered or drought-stressed conditions. Proline content in (A) phloem exudates and (B)  
448 xylem sap. Values are represented as mean  $\pm$  SE (n = 3). Different letters on columns indicate  
449 significant difference at  $P < 0.05$  according to the Duncan's multiple range test.

450

#### 451 **Acknowledgment**

452 The present study was supported by the National Research Foundation of South Korea  
453 (NRF2017RIA2B4002914).

454

455

#### 456 **References**

- 457 **Asano T, Hayashi N, Kobayashi M, et al. 2012.** A rice calcium-dependent protein kinase OsCPK12  
458 oppositely modulates salt-stress tolerance and blast disease resistance. *Plant Journal* **69**, 26–36.
- 459 **Boudsocq M, Sheen J. 2013.** CDPKs in immune and stress signalling. *Trends in Plant Science* **18**, 1.
- 460 **Chen J, Zhang Y, Wang C, Lü W, Jin JB, Hua, X. 2011.** Proline induces calcium-mediated  
461 oxidative burst and salicylic acid signaling. *Amino Acids* **40**, 1473–1484.
- 462 **Chung JS, Zhu JK, Bressan RA, Hasegawa PM, Shi H. 2008.** Reactive oxygen species mediate Na<sup>+</sup>-  
463 induced SOS1 mRNA stability in Arabidopsis. *Plant Journal* **53**, 554–565.
- 464 **Dubiella U, Seybold H, Durian G, Komander E, Lassig R, Witte CP, Schulze WX, Romeis T.**  
465 **2013.** Calcium-dependent protein kinase/NADPH oxidase activation circuit required for defense  
466 signal propagation. *Proceeding of the National Academy of Sciences of the United States of*  
467 *America* **110**, 8744–8749.
- 468 **Elizabeth M, Zhang S. 2000.** Calcium-independent activation of salicylic acid –induced protein kinase  
469 and a 40-kilodalton protein kinase by hyperosmotic stress. *Plant Physiology* **122**, 1355–1363.
- 470 **Finiti I, Leyva MO, Vicedo B, Gómez-Pastor R, López-Cruz J, García-Agustín P, Real MD,**  
471 **González-Bosch C. 2014.** Hexanoic acid protects tomato plants against *Botrytis cinerea* by priming  
472 defence responses and reducing oxidative stress. *Molecular Plant Pathology* **15**, 550–562.

- 473 **Herrera-Vásquez A, Carvalho L, Blanco B, Tobar M, Villarroel-Candia E, Vicente-Carbaijosa J.**  
474 **Salinas P, Holuigue L. 2015.** Transcriptional Control of Glutaredoxin GRXC9 expression by a  
475 salicylic acid-dependent and NPR1-independent pathway in Arabidopsis. *Plant Molecular Biology*  
476 *Reporter* **33**, 624–637.
- 477 **Hong Z, Lakkineni K, Zhang Z, Verma DPS. 2000.** Removal of feedback inhibition of  $\Delta^1$ -pyrroline-5-  
478 carboxylate synthetase results in increased proline accumulation and protection of plants from  
479 osmotic stress. *Plant Physiology* **122**, 1129–1136.
- 480 **Islam MT, Lee BR, Park SH, La VH, Bae DW, Kim TH. 2017.** Cultivar variation in hormonal  
481 balance is a significant determinant of disease susceptibility to *Xanthomonas campestris* pv.  
482 *campestris* in *Brassica napus*. *Frontiers in Plant Science* **8**, 2121.
- 483 **Kan CC, Chung TY, Wu HY, Juo YA, Hsieh MH. 2017.** Exogenous glutamate rapidly induces the  
484 expression of genes involved in metabolism and defense response in rice roots. *BMC Genomics*,  
485 **18**,186.
- 486 **Kaplan F, Kopka J, Sung DY, Zhao W, Popp M, Porat R, Guy CL. 2007.** Transcript and metabolite  
487 profiling during cold acclimation of Arabidopsis reveals an intricate relationship of cold-regulated  
488 gene expression with modifications in metabolite content. *Plant Journal* **50**, 967–981.
- 489 **Kim TH, Lee BR, Jung WJ, Kim KY, Avice JC, Qurry A. 2004.** De novo protein synthesis in relation to  
490 ammonia and proline accumulation in water stressed white clover. *Functional Plant Biology* **31**, 847–  
491 855.
- 492 **Kneeshaw S, Gelinou S, Tada Y, Loake GJ, Spoel SH. 2014.** Selective protein denitrosylation activity of  
493 thioredoxin-h5 modulate plant immunity. *Molecular Cell* **56**, 153–162.
- 494 **Knight H, Trewavas AJ, Knight MR. 1996.** Cold calcium signaling in Arabidopsis involves two cellular  
495 pools and a change in calcium signature after acclimation. *Plant Cell* **8**, 489–503.
- 496 **Kotov AA, Kotova LM. 2015.** Role of acropetal water transport in regulation of cytokinin levels in  
497 stems of pea seedlings. *Russian Journal of Plant Physiology* **62**, 390–400.
- 498 **La VH, Lee BR, Islam MT, Park SH, Jung HI, Bae DW, Kim TH. 2019.** Characterization of  
499 salicylic acid-mediated modulation of the drought stress responses: Reactive oxygen species,  
500 proline, and redox state in *Brassica napus*. *Environmental and Experimental Botany* **157**, 1–10.

- 501 **Lee BR, Li LS, Jung WJ, Jin YL, Avice JC, Qurry A, Kim TH. 2009a.** Water deficit-induced  
502 oxidative stress and the activation of antioxidant enzymes in white clover leaves. *Biologia*  
503 *Plantarum* **53**, 505–510.
- 504 **Lee BR, Jin YL, Avice JC, Cliquet JB, Ourry A, Kim TH. 2009b.** Increased proline loading to  
505 phloem and its effects on nitrogen uptake and assimilation in water-stressed white clover (*Trifolium*  
506 *repens*). *New Phytologist* **182**, 654–663.
- 507 **Lee BR, Jin YL, Park SH, Zaman R, Zhang Q, Avice JC, Ourry A, Kim TH. 2015.** Genotypic  
508 variation in N uptake and assimilation estimated by <sup>15</sup>N tracing in water deficit-stressed *Brassica*  
509 *napus*. *Environmental and Experimental Botany* **109**, 73–79.
- 510 **Lee BR, Zaman R, Avice JC, Ourry A, Kim TH. 2016.** Sulfur use efficiency is a significant  
511 determinant of drought stress tolerance in relation to photosynthetic activity in *Brassica napus*  
512 cultivars. *Frontiers in Plant Science* **7**, 459.
- 513 **Lee BR, Muneer S, Park SH, Zhang Q, Kim TH. 2013.** Ammonium-induced proline and sucrose  
514 accumulation, and their significance in antioxidative activity and osmotic adjustment. *Acta*  
515 *Physiologiae Plantarum* **35**, 2655–2664.
- 516 **Liang X, Zhang L, Natarajan SK, Becker DF. 2013.** Proline mechanism of stress survival. *Antioxidants*  
517 *& Redox Signaling* **19**, 9.
- 518 **Livak JK, Schmittgen TD. 2001.** Analysis of relative gene expression data using real-time quantitative  
519 PCR and the  $2^{-\Delta\Delta Ct}$  method. *Methods* **25**, 402–408.
- 520 **Mezl VA, Knox WE. 1976.** Properties and analysis of a stable derivative of pyrroline-5-carboxylic  
521 acid for use in metabolic studies. *Analytical Biochemistry* **74**, 430–440.
- 522 **Miura K, Tada Y. 2014.** Regulation of water, salinity, and cold stress responses by salicylic acid.  
523 *Frontiers in Plant Science* **5**, 4.
- 524 **Mou Z, Fan W, Dong X. 2003.** Inducers of plant systemic acquired resistance regulate NPR1 function  
525 through redox changes. *Cell* **113**, 935–944.
- 526 **Osakabe Y, Osakabe K, Shinozaki K, Tran LSP. 2014.** Response of plants to water stress. *Frontiers in*  
527 *Plant Science* **5**, 86.

- 528 **Prodhan MY, Munemasa S, Nahar MNEN, Nakamura Y, Murata Y. 2018.** Guard cell salicylic acid  
529 signaling is integrated into abscisic acid signaling via the Ca<sup>2+</sup>/CPK-dependent pathway. *Plant*  
530 *Physiology* **178**, 441–450.
- 531 **Rejeb BK, Lefebvre-De Vos D, Le Disquet I, Leprince AS, Bordenave M, Maldinev R, Jdey A,**  
532 **Abdelly C, Savouré A. 2015.** Hydrogen peroxide produced by NADPH oxidases increases proline  
533 accumulation during salt or mannitol stress in *Arabidopsis thaliana*. *New Phytologist* **208**, 1138–1148.
- 534 **Rejeb KB, Abdelly C, Savouré A. 2014.** How reactive oxygen species and proline face stress together.  
535 *Plant Physiology and Biochemistry* **80**, 278–284.
- 536 **Seyfferth C, Tsuda K. 2014.** Salicylic acid signal transduction: the initiation of biosynthesis,  
537 perception and transcription reprogramming. *Frontiers in Plant Science* **5**, 697.
- 538 **Sharma S, Villamor JG, Verslues PE. 2011.** Essential role of tissue-specific proline synthesis and  
539 catabolism in growth and redox balance at low water potential. *Plant Physiology* **157**, 292–304.
- 540 **Stael S, Kmiciek P, Willems P, Van der Kelen K, Coll NS, Teige M, Breusegem FV. 2015.** Plant  
541 innate immunity-sunny side up?. *Trends in Plant Science* **20**, 1.
- 542 **Straus MR, Rietz S, van Themaat E, Bartsch M, Parker JE. 2010.** Salicylic acid antagonism of  
543 EDS1-driven cell death is important for immune and oxidative stress responses in *Arabidopsis*. *Plant*  
544 *Journal* **62**, 628–640.
- 545 **Szabados L, Savouré A. 2010.** Proline: a multifunctional amino acid. *Trends Plant Science* **15**, 89–97.
- 546 **Szymanski DB, Liao B, Zielinski RE. 1996.** Calmodulin isoforms differentially enhance the binding  
547 of cauliflower nuclear proteins and recombinant TGA3 to a region derived from the *Arabidopsis*  
548 *Cam-3* promoter. *Plant Cell* **8**, 1069–1077.
- 549 **Tada Y, Spoel SH, Pajerowska-Mukhtar K, Mou Z, Song J, Wang C, Zuo J, Dong X. 2008.** Plant  
550 immunity requires conformational changes of NPR1 via S-Nitrosylation and Thioredoxins. *Science*  
551 **321**, 952–956.
- 552 **Tanaka K, Swanson SJ, Gilroy S, Stacey G. 2010.** Extracellular nucleotides elicit cytosolic free  
553 calcium oscillation in *Arabidopsis*. *Plant Physiology* **154**, 705–719.
- 554 **Verslues PE, Kim, YS, Zhu JK. 2007.** Altered ABA, proline and hydrogen peroxide in an  
555 *Arabidopsis* glutamate: glyoxylate aminotransferase mutant. *Plant Molecular Biology* **64**, 205–217.

- 556 **Wang L, Tsuka K, Truman W, Sato M, Nguyen Le V, Katagiri F, Glazebrook J. 2011.** CBP60g  
557 and SARD1 play partially redundant critical roles in salicylic acid signaling. *Plant Journal* **67**, 1029–  
558 1041.
- 559 **Xia XJ, Zhou YH, Shi K, Zhou J, Foyer CH, Yu JQ. 2015.** Interplay between reactive oxygen  
560 species and hormones in the control of plant development and stress tolerance. *Journal of*  
561 *Experimental Botany* **66**, 2839–2856.
- 562 **Zhang Y, Xu S, Ding P, et al. 2010.** Control of salicylic acid synthesis and systemic acquired  
563 resistance by two members of a plant-specific family of transcription factors. *Proceeding of the*  
564 *National Academy of Sciences of the United States of America* **107**, 18220–18225.

565 **Table 1.** Changes in redox status in the leaves of control or glutamate (Glu)-treated *Brassica napus* under well-watered or drought-  
 566 stressed conditions

| Treatments    | Days after treatment        |                           |              |                             |                           |                           |                             |                           |                            |
|---------------|-----------------------------|---------------------------|--------------|-----------------------------|---------------------------|---------------------------|-----------------------------|---------------------------|----------------------------|
|               | 0                           |                           |              | 5                           |                           |                           | 15                          |                           |                            |
| Reduced       | NADPH                       | NADH                      | GSH          | NADPH                       | NADH                      | GSH                       | NADPH                       | NADH                      | GSH                        |
| Control       | 2.65 ± 0.83                 | 5.39 ± 0.48               | 61.51 ± 4.81 | 2.62 ± 0.17 <sup>b</sup>    | 5.58 ± 0.44 <sup>a</sup>  | 58.58 ± 2.01 <sup>a</sup> | 2.32 ± 0.25 <sup>c</sup>    | 4.44 ± 0.33 <sup>c</sup>  | 53.20 ± 3.26 <sup>a</sup>  |
| Glu           | -                           | -                         | -            | -                           | -                         | -                         | 5.28 ± 0.39 <sup>a</sup>    | 5.07 ± 0.40 <sup>bc</sup> | 60.35 ± 5.00 <sup>a</sup>  |
| Drought       | -                           | -                         | -            | 3.48 ± 0.25 <sup>a</sup>    | 5.79 ± 0.12 <sup>a</sup>  | 15.77 ± 0.21 <sup>b</sup> | 3.78 ± 0.10 <sup>b</sup>    | 5.37 ± 0.03 <sup>b</sup>  | 7.27 ± 0.12 <sup>c</sup>   |
| Drought + Glu | -                           | -                         | -            | -                           | -                         | -                         | 4.84 ± 0.04 <sup>b</sup>    | 6.56 ± 0.03 <sup>a</sup>  | 38.67 ± 1.87 <sup>b</sup>  |
| Oxidized      | NADP <sup>+</sup>           | NAD <sup>+</sup>          | GSSG         | NADP <sup>+</sup>           | NAD <sup>+</sup>          | GSSG                      | NADP <sup>+</sup>           | NAD <sup>+</sup>          | GSSG                       |
| Control       | 8.86 ± 0.06                 | 6.81 ± 0.06               | 2.30 ± 0.05  | 9.62 ± 0.59 <sup>b</sup>    | 6.82 ± .30 <sup>b</sup>   | 2.62 ± 0.05 <sup>b</sup>  | 7.23 ± 1.05 <sup>d</sup>    | 6.01 ± 0.22 <sup>c</sup>  | 2.45 ± 0.09 <sup>a</sup>   |
| Glu           | -                           | -                         | -            | -                           | -                         | -                         | 14.36 ± 0.61 <sup>c</sup>   | 8.53 ± 0.25 <sup>b</sup>  | 3.10 ± 0.25 <sup>a</sup>   |
| Drought       | -                           | -                         | -            | 17.80 ± 1.00 <sup>a</sup>   | 9.10 ± 0.17 <sup>a</sup>  | 3.23 ± 0.13 <sup>a</sup>  | 24.57 ± 0.30 <sup>a</sup>   | 9.89 ± 0.07 <sup>a</sup>  | 2.69 ± 0.22 <sup>a</sup>   |
| Drought + Glu | -                           | -                         | -            | -                           | -                         | -                         | 21.36 ± 0.52 <sup>b</sup>   | 9.51 ± 0.17 <sup>a</sup>  | 2.47 ± 0.22 <sup>a</sup>   |
| Ratios        | NADPH/<br>NADP <sup>+</sup> | NADH/<br>NAD <sup>+</sup> | GSH/<br>GSSG | NADPH/<br>NADP <sup>+</sup> | NADH/<br>NAD <sup>+</sup> | GSH/<br>GSSG              | NADPH/<br>NADP <sup>+</sup> | NADH/<br>NAD <sup>+</sup> | GSH/<br>GSSG               |
| Control       | 0.41 ± 0.02                 | 0.79 ± 0.07               | 26.65 ± 1.98 | 0.26 ± 0.00 <sup>a</sup>    | 0.81 ± 0.03 <sup>a</sup>  | 25.94 ± 1.02 <sup>a</sup> | 0.27 ± 0.02 <sup>b</sup>    | 0.74 ± 0.06 <sup>a</sup>  | 21.70 ± 0.67 <sup>a</sup>  |
| Glu           | -                           | -                         | -            | -                           | -                         | -                         | 0.37 ± 0.02 <sup>a</sup>    | 0.60 ± 0.04 <sup>ab</sup> | 19.58 ± 1.20 <sup>ab</sup> |
| Drought       | -                           | -                         | -            | 0.21 ± 0.01 <sup>a</sup>    | 0.64 ± 0.02 <sup>b</sup>  | 4.92 ± 0.25 <sup>b</sup>  | 0.15 ± 0.03 <sup>c</sup>    | 0.54 ± 0.00 <sup>b</sup>  | 2.75 ± 0.21 <sup>c</sup>   |
| Drought + Glu | -                           | -                         | -            | -                           | -                         | -                         | 0.21 ± 0.00 <sup>bc</sup>   | 0.69 ± 0.01 <sup>ab</sup> | 15.96 ± 1.36 <sup>b</sup>  |

567 Reduced form of nicotinamide adenine dinucleotide (phosphate), NAD(P)H; oxidized form of nicotinamide adenine dinucleotide  
 568 (phosphate), NAD(P)<sup>+</sup>; reduced form of glutathione, GSH; oxidized form of glutathione, GSSG. NAD(P)H and NAD(P)<sup>+</sup> contents  
 569 are shown as nmol g<sup>-1</sup> fresh weight. GSH and GSSG contents are shown as μmol g<sup>-1</sup> fresh weight. Values are mean ± SE for n = 3.  
 570 Different lowercase letters in a column indicate significant differences at *P* < 0.05 according to the Duncan's multiple range test.

571 **Figure legends**

572

573 **Fig 1.** Changes in plant morphology, osmotic potential, and chlorophyll and carotenoid content in the  
574 leaves of control or glutamate (Glu)-treated *Brassica napus* under well-watered or drought-stressed  
575 conditions. (A) Plant morphology, (B) osmotic potential, (C) chlorophyll content, and (D) carotenoid  
576 content. Values are represented as mean  $\pm$  SE (n = 3). Different letters on columns indicate significant  
577 difference at  $P < 0.05$  according to the Duncan's multiple range test.

578

579 **Fig 2.** Phytohormone content in the leaves of control or glutamate (Glu)-treated *Brassica napus* under  
580 well-watered or drought stress conditions. (A) Abscisic acid (ABA), (B) salicylic acid (SA), (C) indole-  
581 3-acetic acid (IAA), and (D) cytokinin (CK) content. Values are represented as mean  $\pm$  SE (n = 3).  
582 Different letters on columns indicate significant difference at  $P < 0.05$  according to the Duncan's  
583 multiple range test.

584

585 **Fig 3.** The relative expression of genes related to phytohormone synthesis or signaling in the leaves of  
586 control or glutamate (Glu)-treated *Brassica napus* under well-watered or drought-stressed conditions.  
587 ABA-responsive genes (A) myb-like transcription factor (*MYB2.1*) and (B) NAC domain-containing  
588 protein 55 (*NAC55*); SA synthesis-related genes (C) WRKY transcription factor 28 (*WRKY28*) and (D)  
589 isochorismate synthase 1 (*ICS1*); SA-responsive genes (E) nonexpressor of pathogenesis-related (PR)  
590 gene (*NPRI*) and (F) *PR-1*. qRT-PCR was performed in duplicate for each of the three independent  
591 biological samples. Values are represented as mean  $\pm$  SE (n = 3). Different letters on columns indicate  
592 significant difference at  $P < 0.05$  according to the Duncan's multiple range test.

593

594 **Fig 4.** Changes in glutamate receptor, ROS,  $\text{Ca}^{2+}$  content and its signaling, and NADPH oxidases in the  
595 leaves of control or glutamate (Glu)-treated *Brassica napus* under well-watered or drought-stressed  
596 conditions. (A) Glutamate receptor (*GLRI.3*), visualization of (B)  $\text{O}_2^-$  and (C)  $\text{H}_2\text{O}_2$ , (D)  $\text{Ca}^{2+}$  content,  
597 (E) calcium-dependent protein kinase 5 (*CPK5*), and (F) *NADPH oxidase*. qRT-PCR was performed in  
598 duplicate for each of the three independent biological samples. Values are represented as mean  $\pm$  SE (n  
599 = 3). Different letters on columns indicate significant difference at  $P < 0.05$  according to the Duncan's  
600 multiple range test.

601



602 **Fig 5.** Changes in proline metabolism in the leaves of control or glutamate (Glu)-treated *Brassica*  
603 *napus* under well-watered or drought-stressed conditions. (A) Pyrroline-5-carboxylate (P5C) synthase 1  
604 (*P5CS1*), (B) *P5CS2*, (C) P5CS content, (D) pyrroline-5-carboxylate reductase (*P5CR*), (E) proline  
605 content, (F) proline dehydrogenase (*PDH*), and (G) pyrroline-5-carboxylate dehydrogenase (*P5CDH*).  
606 qRT-PCR was performed in duplicate for each of the three independent biological samples. Values are  
607 represented as mean  $\pm$  SE (n = 3). Different letters on columns indicate significant difference at  $P <$   
608 0.05 according to the Duncan's multiple range test.

609

610 **Fig 6.** Relative expression of genes related to redox signaling in the leaves of control or glutamate  
611 (Glu)-treated *Brassica napus* under well-watered or drought-stressed conditions. (A) CC-type  
612 glutaredoxin 9 (*GRXC9*), (B) thioredoxin-h5 (*TRXh5*), and (C) TGA-box transcription factor (*TGA2*).  
613 qRT-PCR was performed in duplicate for each of the three independent biological samples. Values are  
614 represented as mean  $\pm$  SE (n = 3). Different letters on columns indicate significant difference at  $P <$   
615 0.05 according to the Duncan's multiple range test.

616

617 **Fig 7.** Heatmap analysis of the treatment effect and correlations among the variables measured at day  
618 15 (after 15 d of drought, including 10 d of glutamate application). (A) Heatmap comparing the  
619 changes in the identified metabolites or gene expression levels in the leaves of control or glutamate  
620 (Glu)-treated plants under well-watered or drought-stressed conditions. The normalization procedure  
621 consisted of mean row-centering with color scales. (B) Heatmap showing the correlations among the  
622 identified metabolites or gene expression levels. Correlations coefficients were calculated based on  
623 Pearson's correlation. Red indicates a positive effect, whereas blue indicates a negative effect. Color  
624 intensity is proportional to the correlation coefficients.

625

626 **Fig 8.** Proposed model for glutamate-mediated hormone antagonism, proline synthesis, and redox  
627 modulation under drought and/or glutamate treatment. Black arrows represent the ABA-dependent  
628 pathway of response to drought, and green arrows represent the glutamate-mediated SA pathway under  
629 drought. Red or blue arrows indicate the decrease or increase of redox potential. The thickness of the  
630 arrow expresses the strength of induced or depressed response.

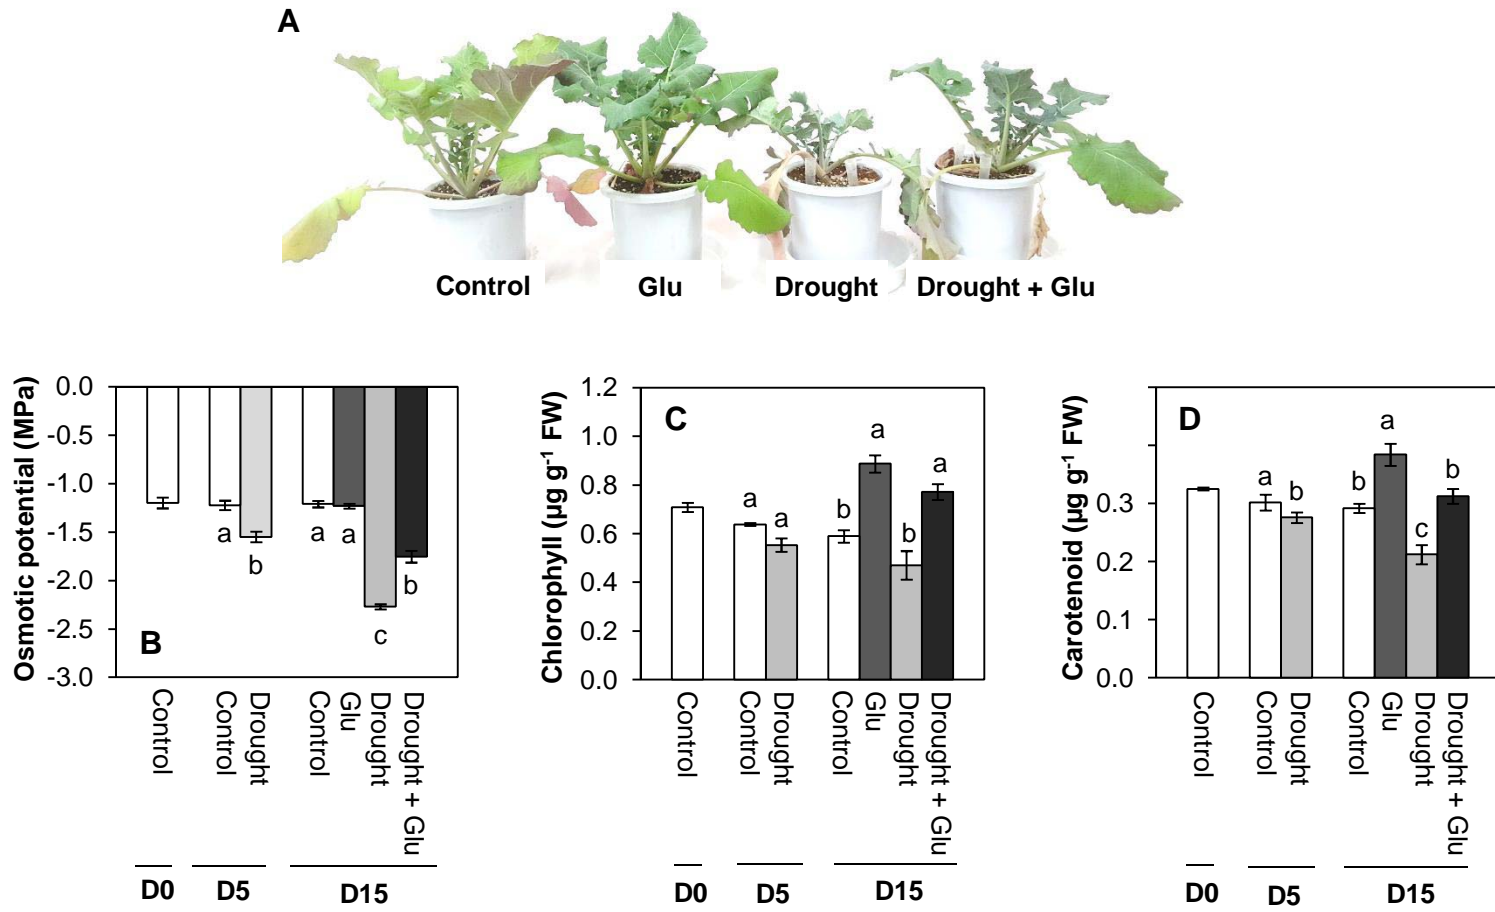

**Fig. 1.**

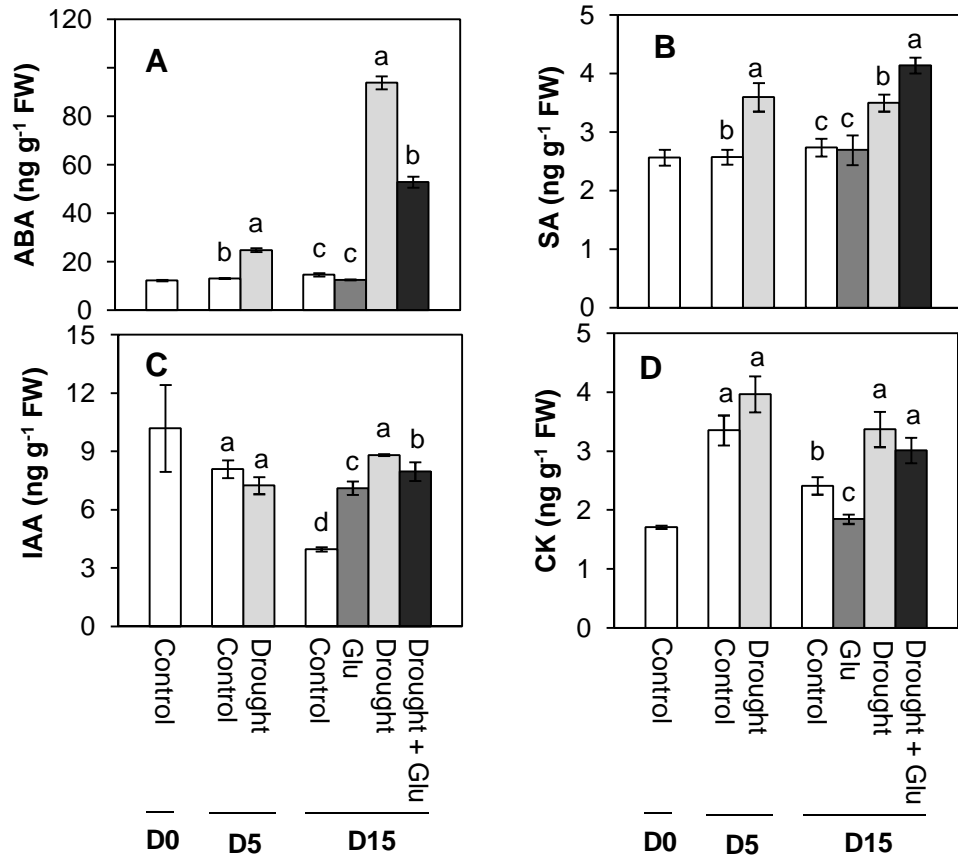

Fig. 2.

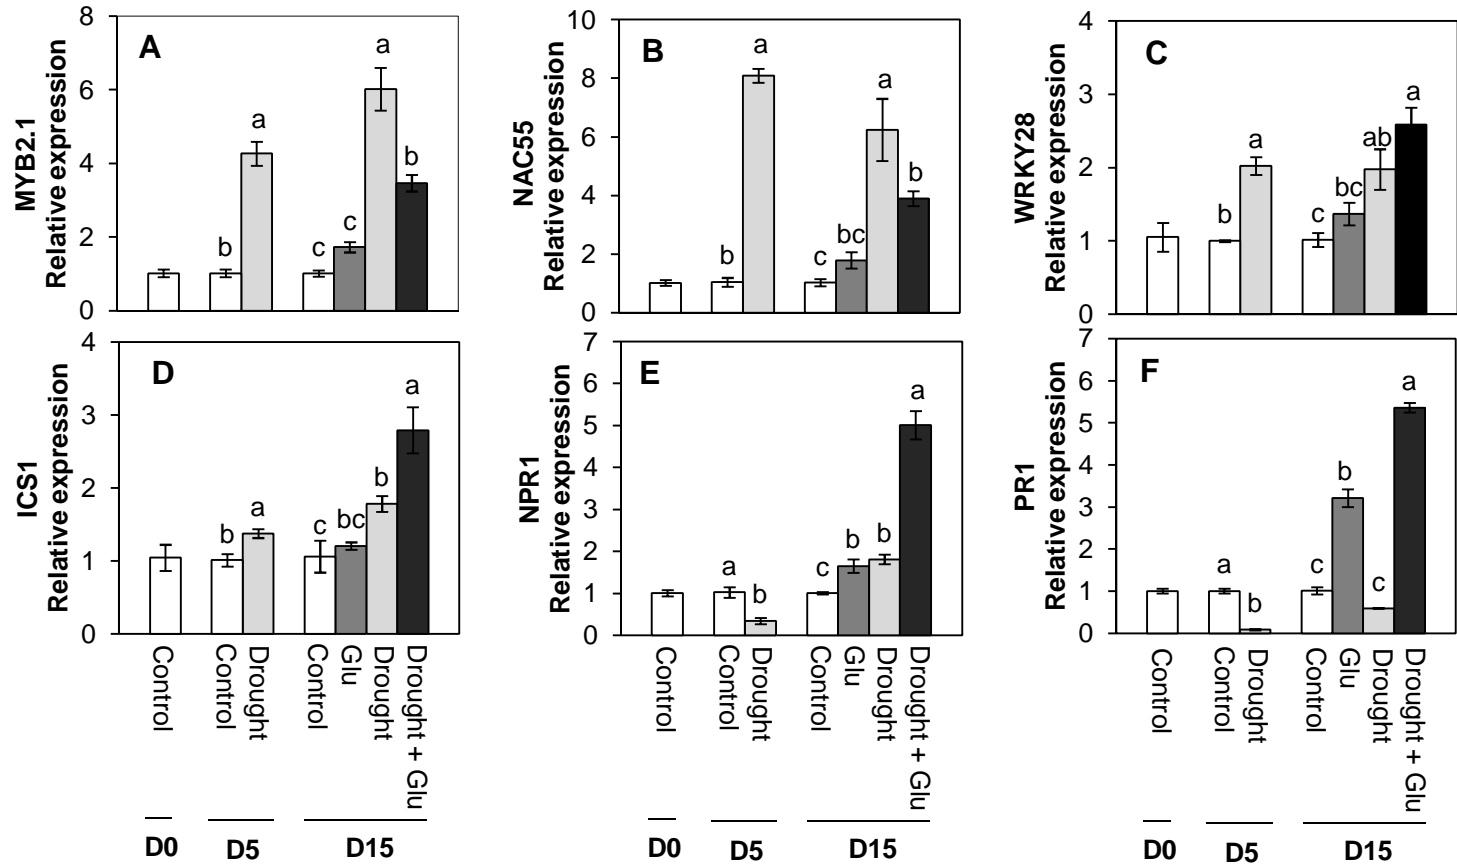

Fig. 3.

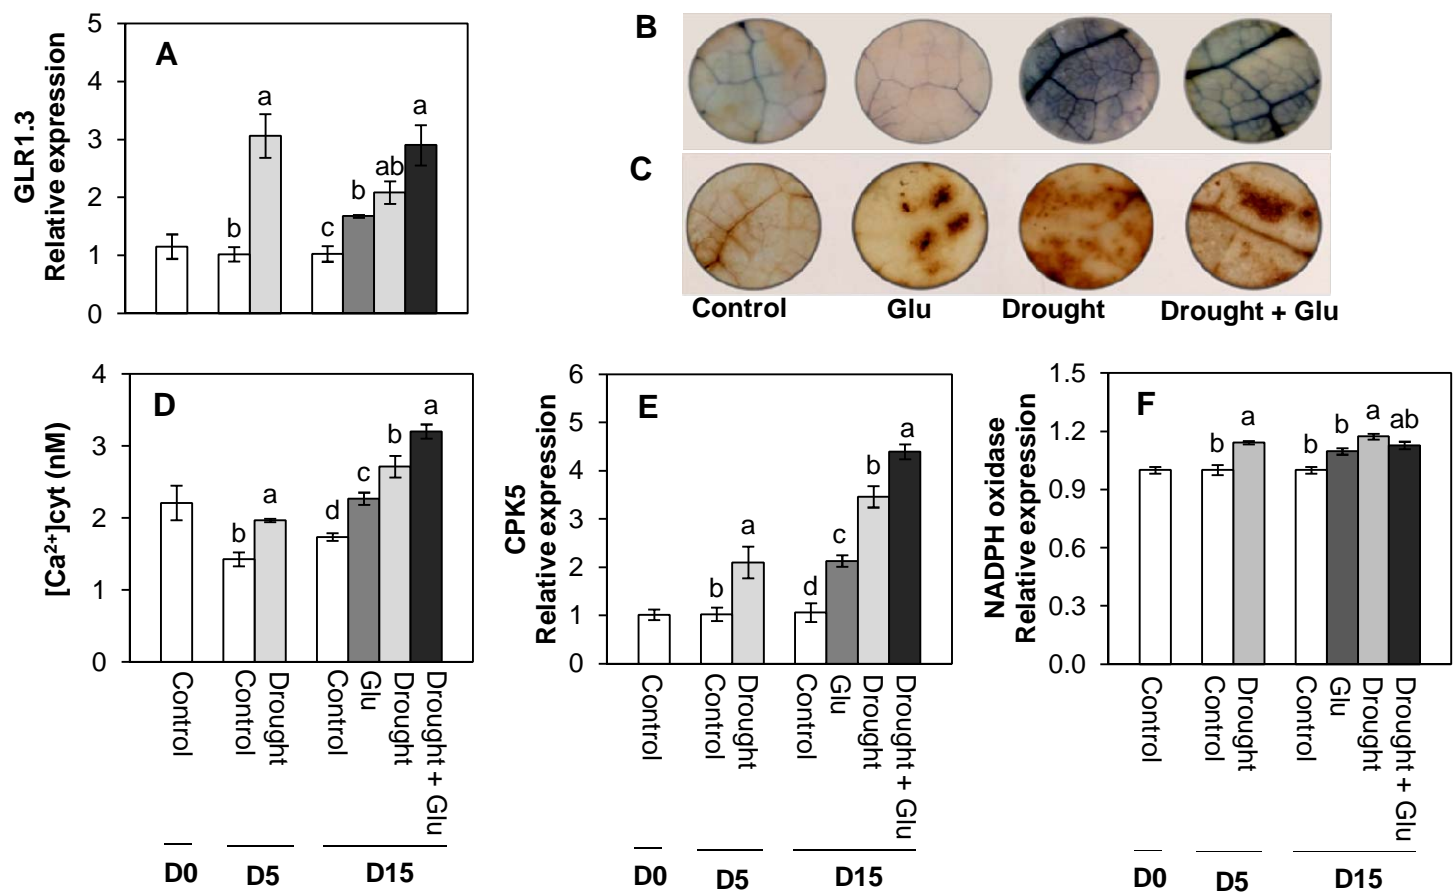

**Fig. 4.**

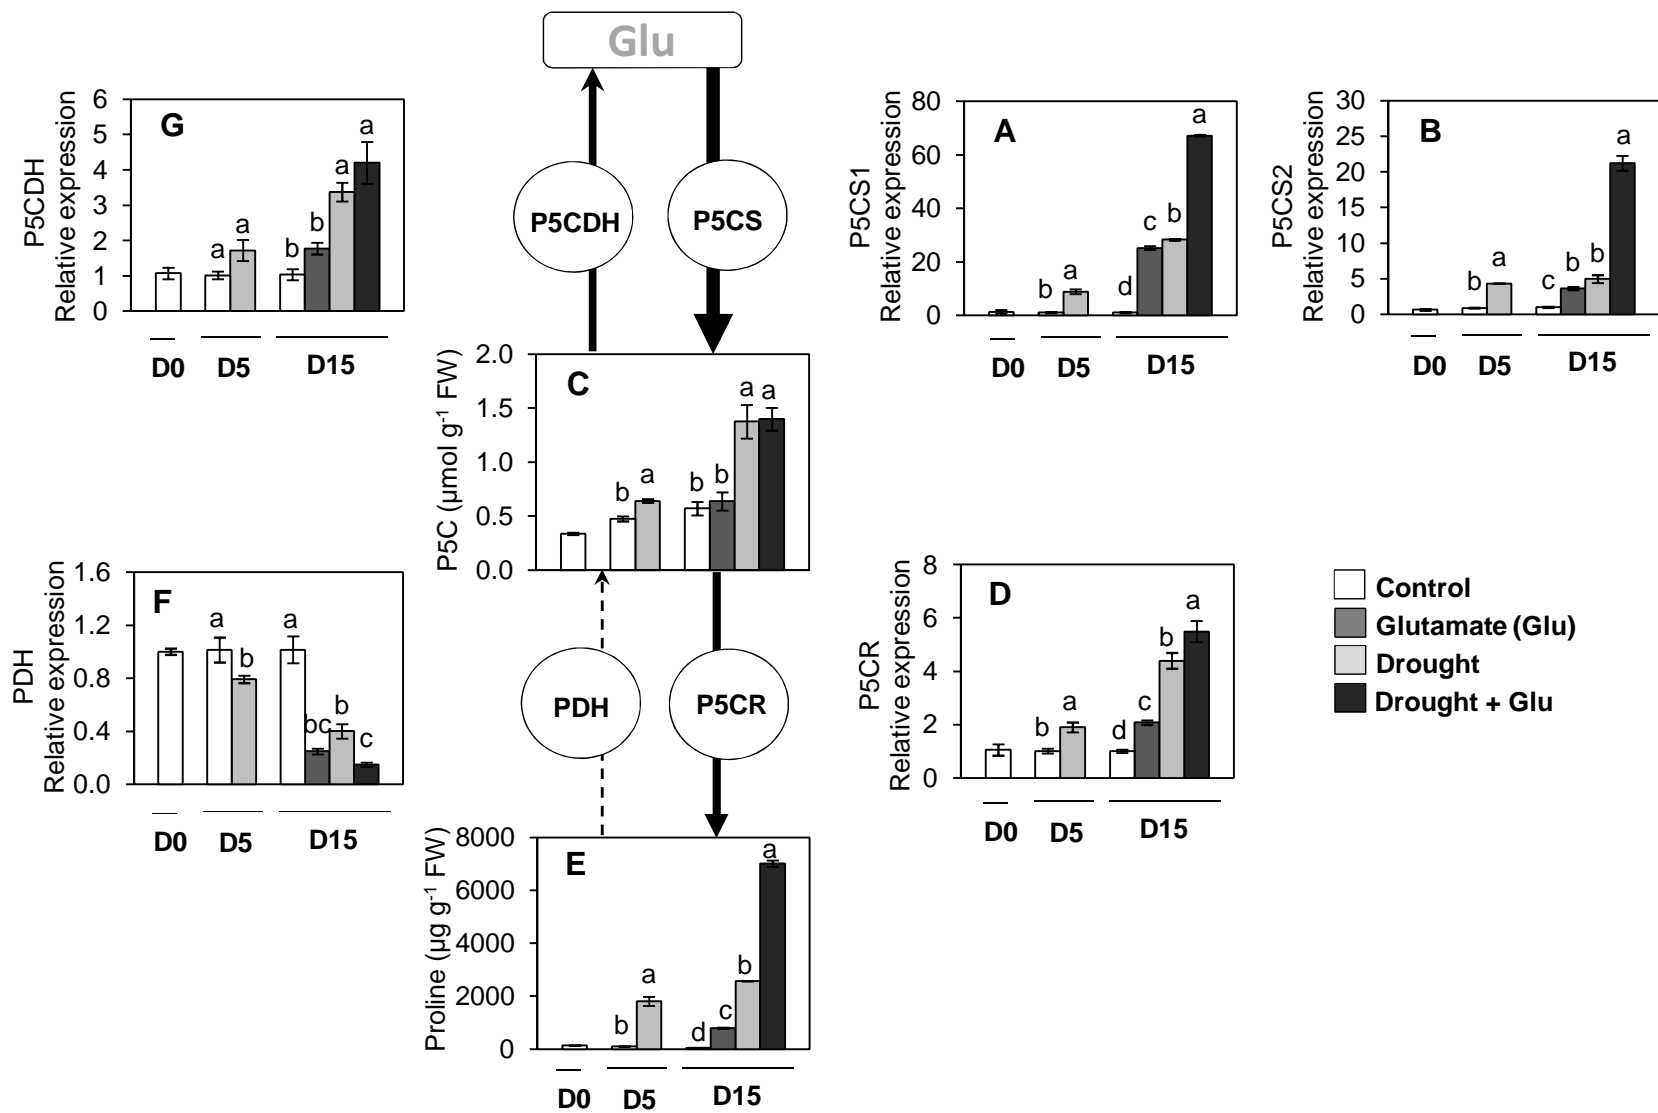

**Fig. 5.**

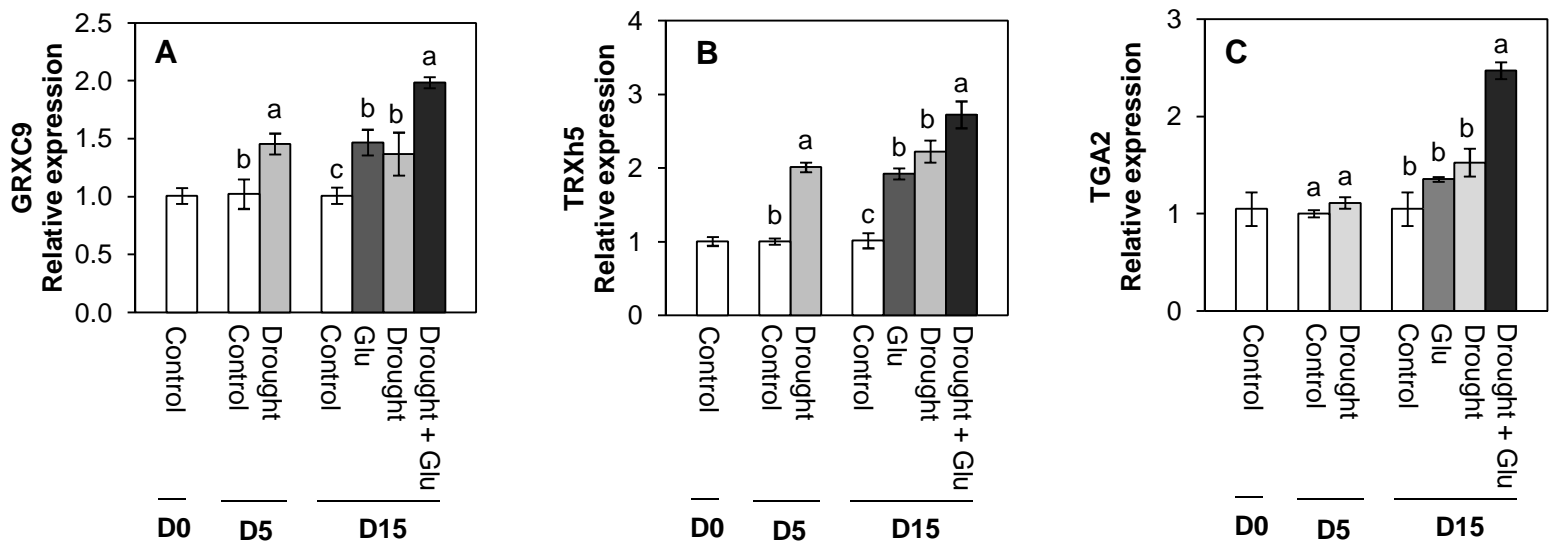

Fig. 6.





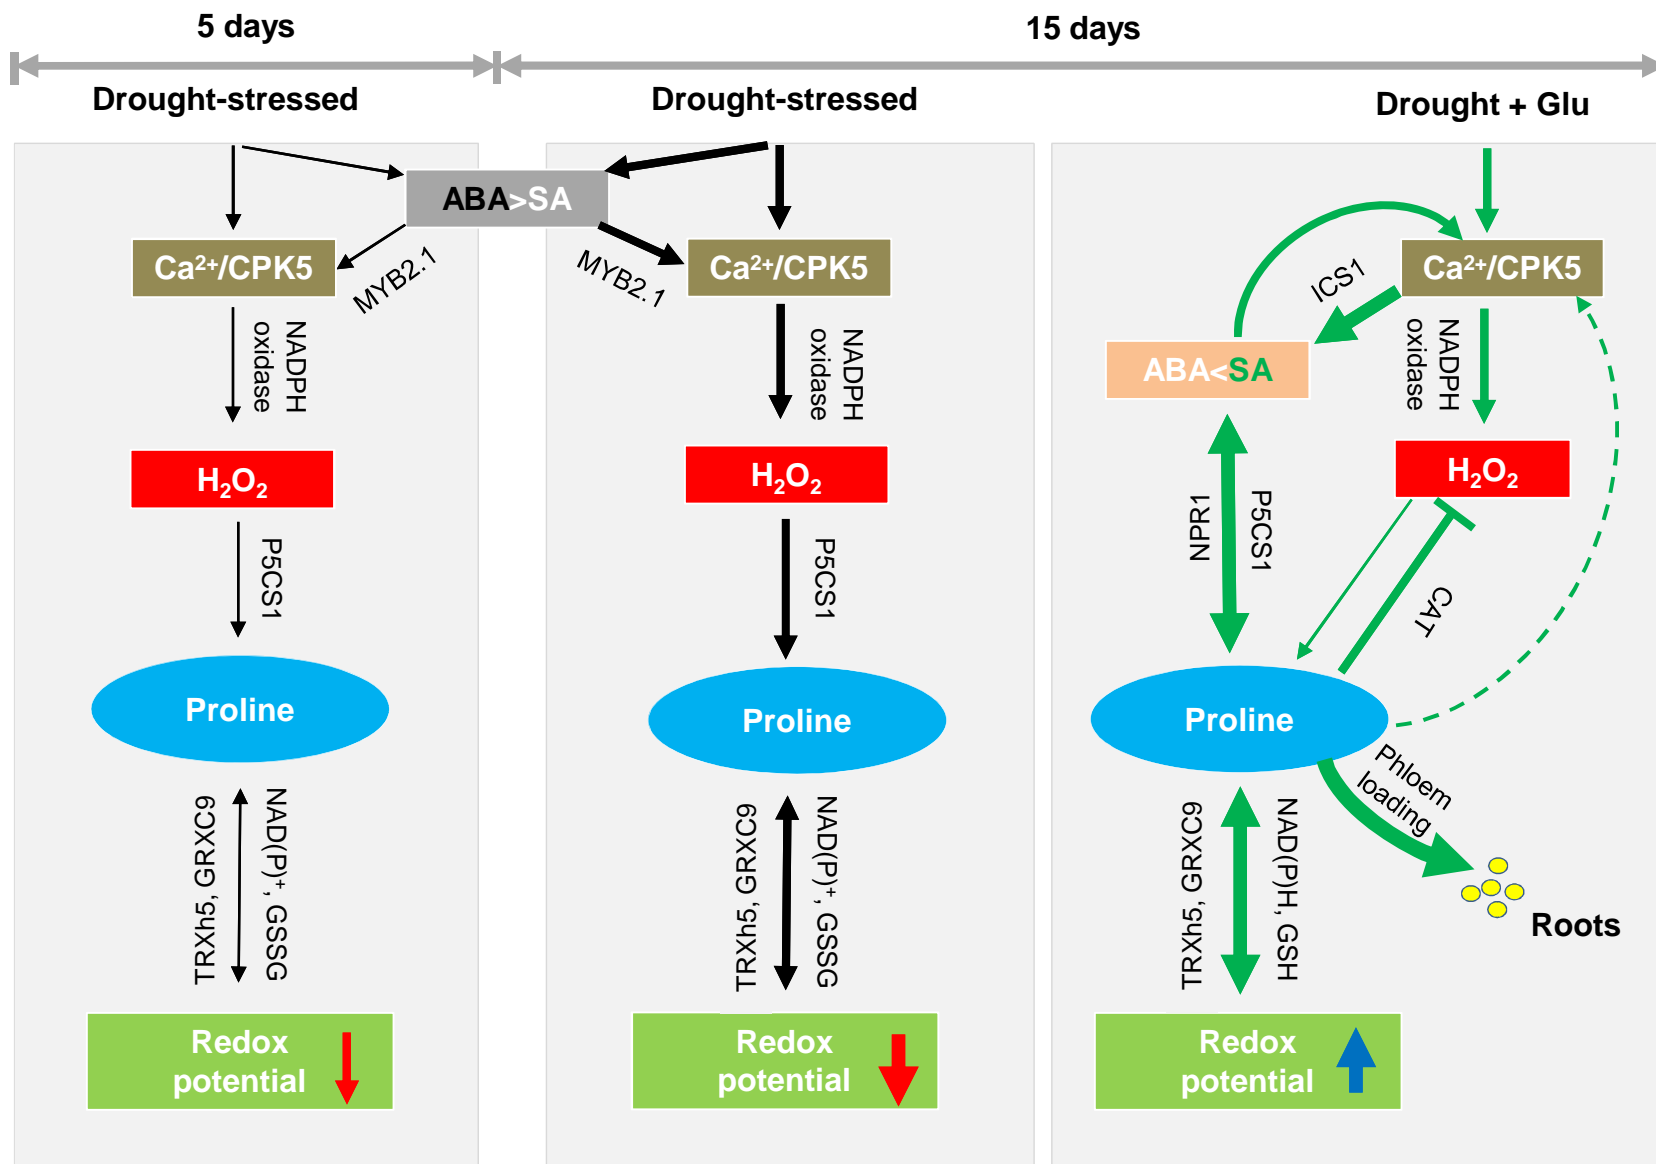

Fig. 8.
